# Supplementary material for: SIRT2 knockout exacerbates insulin resistance in high fat-fed mice
Source: PubMed Central journal article supplement (PMC6289500; doi:10.1371/journal.pone.0208634), 2018-12-11

**Figure S1**

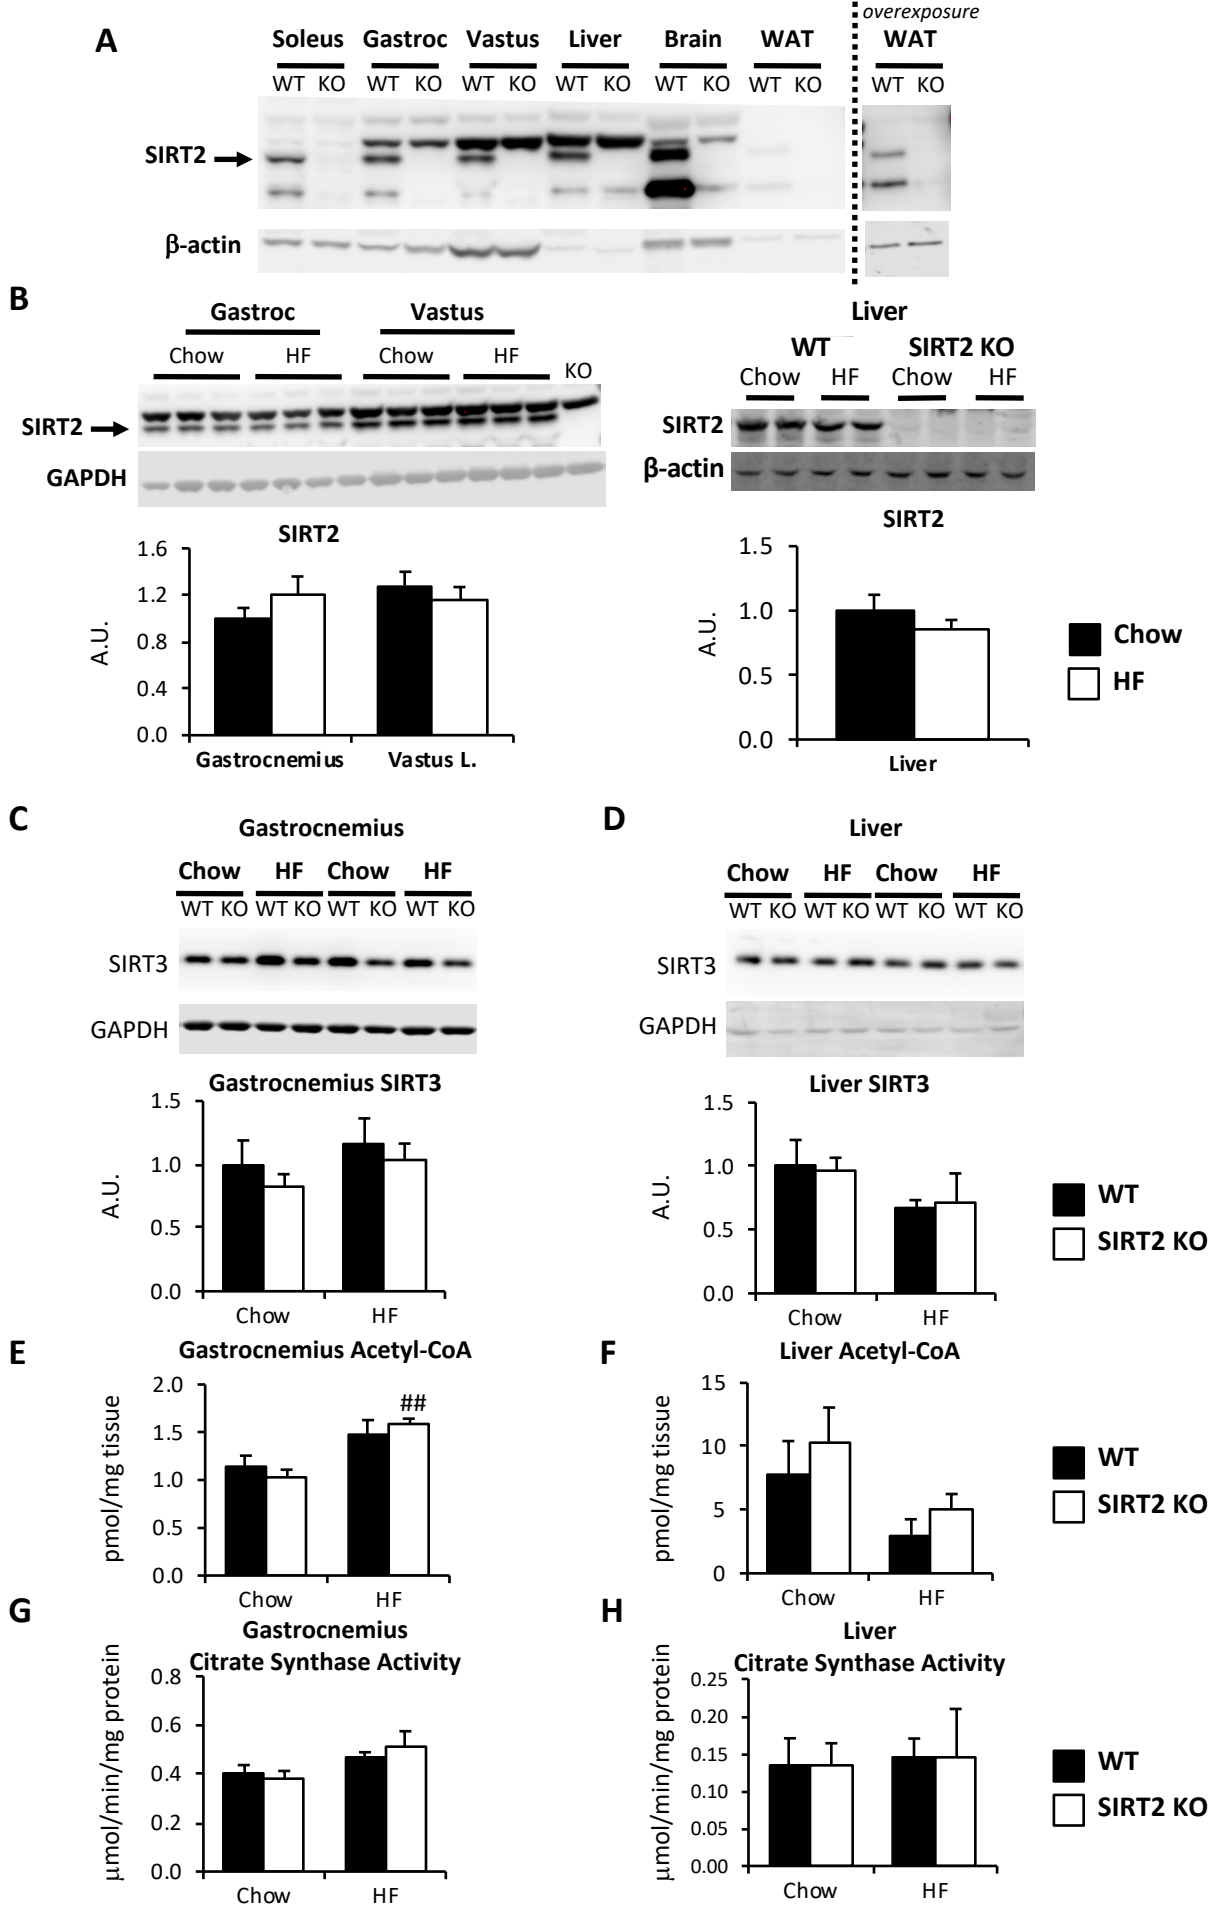

Supplement: pone.0208634.s001.pdf [file pone.0208634.s001.pdf]
